# Supplementary material
Source: PubMed Central journal article supplement (PMC9248910)
Supplement: NIHMS1762463-supplement-1.pdf [file NIHMS1762463-supplement-1.pdf]

## SUPPLEMENTARY MATERIALS

**Supplementary Table 1:** Intraclass correlation coefficient (ICC) of the shape features

| Feature Class | Feature Name            | ICC                |
|---------------|-------------------------|--------------------|
| shape         | Elongation              | 0.55 (0.4, 0.68)   |
| shape         | Flatness                | 0.54 (0.38, 0.66)  |
| shape         | LeastAxisLength         | 0.29 (0.1, 0.46)   |
| shape         | MajorAxisLength         | 0.4 (0.22, 0.55)   |
| shape         | Maximum2DDiameterColumn | 0.37 (0.19, 0.53)  |
| shape         | Maximum2DDiameterRow    | 0.2 (0, 0.38)      |
| shape         | Maximum2DDiameterSlice  | 0.25 (0.06, 0.43)  |
| shape         | Maximum3DDiameter       | 0.2 (0.01, 0.38)   |
| shape         | MeshVolume              | 0.68 (0.56, 0.78)  |
| shape         | MinorAxisLength         | 0.42 (0.25, 0.57)  |
| shape         | Sphericity              | 0.54 (0.38, 0.66)  |
| shape         | SurfaceArea             | 0.17 (-0.03, 0.35) |
| shape         | SurfaceVolumeRatio      | 0.07 (-0.13, 0.26) |
| shape         | VoxelVolume             | 0.69 (0.57, 0.78)  |

**Supplementary Table 2:** Intraclass correlation coefficient (ICC) of the texture features

Please contact author at ([yin.xi@utsouthwestern.edu](mailto:yin.xi@utsouthwestern.edu)) for Supplementary Table 2.
